# Supplementary material
Source: publisher figshare collection journal article supplement (https://acs.figshare.com/ndownloader/files/5339401)
Supplement: Supplementary file 1 [file 5339401]

 
data_wph052m
_publ_contact_author_name        'Charles U. Pittman, Jr.'
_publ_contact_author_address     
;Department of Chemistry
Mississippi State University
Box 9573
Mississippi State, MS   39762
;
_publ_contact_author_email       cpittman@chemistry.msstate.edu
_publ_contact_author_phone       1(662)3257616
_publ_contact_author_fax         1(662)3251618
loop_
_publ_author_name
_publ_author_address
'Ye, Guozhong'
;Department of Chemistry
Mississippi State University
Box 9573
Mississippi State, MS   39762
;
'Zhou, Aihua'
;Department of Chemistry
Mississippi State University
Box 9573
Mississippi State, MS   39762
;
'Henry, William P.'
;Department of Chemistry
Mississippi State University
Box 9573
Mississippi State, MS   39762
;
'Song, Yingquan'
;Department of Chemistry
Mississippi State University
Box 9573
Mississippi State, MS   39762
;
'Chatterjee, Sabornie'
;Department of Chemistry
Mississippi State University
Box 9573
Mississippi State, MS   39762
;
'Pittman Jr., Charles U.'
;Department of Chemistry
Mississippi State University
Box 9573
Mississippi State, MS   39762
;

_audit_creation_method           SHELXL-97
_chemical_name_systematic        
;'5,5,8,8-Tetra-n-butyl-1,2-dihydroimidazo[1,2,3-ij][1,8]naphthyridine-
4,6,7,9(5H,8H)tetraone'
;
_chemical_name_common            ?
_chemical_melting_point          ?
_chemical_formula_moiety         ?
_chemical_formula_sum            'C22 H32 N2 O4'
_chemical_formula_weight         388.50

loop_
_atom_type_symbol
_atom_type_description
_atom_type_scat_dispersion_real
_atom_type_scat_dispersion_imag
_atom_type_scat_source
C C 0.0033 0.0016 'International Tables Vol C Tables 4.2.6.8 and 6.1.1.4'
H H 0.0000 0.0000 'International Tables Vol C Tables 4.2.6.8 and 6.1.1.4'
N N 0.0061 0.0033 'International Tables Vol C Tables 4.2.6.8 and 6.1.1.4'
O O 0.0106 0.0060 'International Tables Vol C Tables 4.2.6.8 and 6.1.1.4'

_symmetry_cell_setting           triclinic
_symmetry_space_group_name_H-M   'P -1'
_symmetry_int_tables_number      2

loop_
_symmetry_equiv_pos_as_xyz
'x, y, z'
'-x, -y, -z'

_cell_length_a                   10.815(9)
_cell_length_b                   11.663(10)
_cell_length_c                   21.724(18)
_cell_angle_alpha                90.008(15)
_cell_angle_beta                 90.126(16)
_cell_angle_gamma                104.101(15)
_cell_volume                     2658(4)
_cell_formula_units_Z            5
_cell_measurement_temperature    273(2)
_cell_measurement_reflns_used    ?
_cell_measurement_theta_min      ?
_cell_measurement_theta_max      ?

_exptl_crystal_description       cubic
_exptl_crystal_colour            colorless
_exptl_crystal_size_max          0.73
_exptl_crystal_size_mid          0.66
_exptl_crystal_size_min          0.57
_exptl_crystal_density_meas      ?
_exptl_crystal_density_diffrn    1.214
_exptl_crystal_density_method    'not measured'
_exptl_crystal_F_000             1050
_exptl_absorpt_coefficient_mu    0.083
_exptl_absorpt_correction_type   ?
_exptl_absorpt_correction_T_min  ?
_exptl_absorpt_correction_T_max  ?
_exptl_absorpt_process_details   ?

_exptl_special_details           
; 
 ? 
;

_diffrn_ambient_temperature      273(2)
_diffrn_radiation_probe          ?
_diffrn_radiation_type           MoK\a
_diffrn_radiation_wavelength     0.71073
_diffrn_source                   'fine-focus sealed tube'
_diffrn_radiation_monochromator  graphite
_diffrn_measurement_device_type  ?
_diffrn_measurement_method       ?
_diffrn_detector_area_resol_mean ?
_diffrn_standards_number         ?
_diffrn_standards_interval_count ?
_diffrn_standards_interval_time  ?
_diffrn_standards_decay_%        ?
_diffrn_reflns_number            20074
_diffrn_reflns_av_R_equivalents  0.3287
_diffrn_reflns_av_sigmaI/netI    0.2807
_diffrn_reflns_limit_h_min       -12
_diffrn_reflns_limit_h_max       12
_diffrn_reflns_limit_k_min       -13
_diffrn_reflns_limit_k_max       13
_diffrn_reflns_limit_l_min       -25
_diffrn_reflns_limit_l_max       25
_diffrn_reflns_theta_min         1.80
_diffrn_reflns_theta_max         25.26
_reflns_number_total             9417
_reflns_number_gt                3852
_reflns_threshold_expression     >2sigma(I)

_computing_data_collection       ?
_computing_cell_refinement       ?
_computing_data_reduction        ?
_computing_structure_solution    'SHELXS-97 (Sheldrick, 1990)'
_computing_structure_refinement  'SHELXL-97 (Sheldrick, 1997)'
_computing_molecular_graphics    ?
_computing_publication_material  ?

_refine_special_details          
; 
 Refinement of F^2^ against ALL reflections.  The weighted R-factor wR and 
 goodness of fit S are based on F^2^, conventional R-factors R are based 
 on F, with F set to zero for negative F^2^. The threshold expression of 
 F^2^ > 2sigma(F^2^) is used only for calculating R-factors(gt) etc. and is 
 not relevant to the choice of reflections for refinement.  R-factors based 
 on F^2^ are statistically about twice as large as those based on F, and R- 
 factors based on ALL data will be even larger. 
;

_refine_ls_structure_factor_coef Fsqd
_refine_ls_matrix_type           full
_refine_ls_weighting_scheme      calc
_refine_ls_weighting_details     
'calc w=1/[\s^2^(Fo^2^)+(0.0153P)^2^+0.0000P] where P=(Fo^2^+2Fc^2^)/3'
_atom_sites_solution_primary     direct
_atom_sites_solution_secondary   difmap
_atom_sites_solution_hydrogens   geom
_refine_ls_hydrogen_treatment    constr
_refine_ls_extinction_method     SHELXL
_refine_ls_extinction_coef       0.0005(15)
_refine_ls_extinction_expression Fc^*^=kFc[1+0.001xFc^2^\l^3^/sin(2\q)]^-1/4^
_refine_ls_number_reflns         9417
_refine_ls_number_parameters     604
_refine_ls_number_restraints     0
_refine_ls_R_factor_all          0.1651
_refine_ls_R_factor_gt           0.0892
_refine_ls_wR_factor_ref         0.2706
_refine_ls_wR_factor_gt          0.2202
_refine_ls_goodness_of_fit_ref   0.878
_refine_ls_restrained_S_all      0.878
_refine_ls_shift/su_max          0.262
_refine_ls_shift/su_mean         0.020

loop_
_atom_site_label
_atom_site_type_symbol
_atom_site_fract_x
_atom_site_fract_y
_atom_site_fract_z
_atom_site_U_iso_or_equiv
_atom_site_adp_type
_atom_site_occupancy
_atom_site_symmetry_multiplicity
_atom_site_calc_flag
_atom_site_refinement_flags
_atom_site_disorder_assembly
_atom_site_disorder_group
N3 N 0.4199(3) 1.1629(2) 0.15676(13) 0.0668(8) Uani 1 1 d . . .
N1 N 0.2088(3) 0.6146(2) 0.34209(13) 0.0610(8) Uani 1 1 d . . .
N2 N 0.4186(3) 0.6630(2) 0.34326(14) 0.0666(8) Uani 1 1 d . . .
N4 N 0.2086(3) 1.1150(2) 0.15803(13) 0.0625(8) Uani 1 1 d . . .
O7 O 0.1843(3) 0.2757(2) 0.28727(14) 0.0876(9) Uani 1 1 d . . .
O5 O 0.1834(3) 0.7767(2) 0.21309(14) 0.0904(9) Uani 1 1 d . . .
C6 C 0.3148(3) 1.0740(3) 0.16825(15) 0.0572(9) Uani 1 1 d . . .
C10 C 0.3179(3) 0.9612(3) 0.18693(14) 0.0552(8) Uani 1 1 d . . .
C14 C 0.3177(3) 0.4618(3) 0.31362(15) 0.0572(9) Uani 1 1 d . . .
C15 C 0.3149(3) 0.5741(3) 0.33204(15) 0.0554(9) Uani 1 1 d . . .
O8 O 0.4531(3) 0.3403(2) 0.28697(15) 0.0980(10) Uani 1 1 d . . .
C9 C 0.1953(3) 0.8784(3) 0.19568(16) 0.0635(9) Uani 1 1 d . . .
O6 O 0.4539(3) 0.8401(2) 0.21378(15) 0.0993(9) Uani 1 1 d . . .
C12 C 0.0693(3) 0.4177(3) 0.31826(17) 0.0684(10) Uani 1 1 d . . .
O1 O -0.0018(3) 0.5903(2) 0.34405(15) 0.1027(10) Uani 1 1 d . . .
C13 C 0.1953(3) 0.3772(3) 0.30536(16) 0.0674(10) Uani 1 1 d . . .
C8 C 0.0708(4) 0.9172(3) 0.18161(17) 0.0704(10) Uani 1 1 d . . .
O4 O -0.0021(3) 1.0901(3) 0.15681(15) 0.1032(10) Uani 1 1 d . . .
O3 O 0.6307(3) 1.2343(3) 0.15071(17) 0.1252(12) Uani 1 1 d . . .
C5 C 0.4415(4) 0.9369(3) 0.19570(17) 0.0662(10) Uani 1 1 d . . .
C16 C 0.4412(3) 0.4350(3) 0.30500(17) 0.0646(9) Uani 1 1 d . . .
O2 O 0.6305(3) 0.7354(3) 0.34967(18) 0.1274(13) Uani 1 1 d . . .
C4 C 0.5623(4) 1.0336(3) 0.18222(18) 0.0737(11) Uani 1 1 d . . .
C17 C 0.5640(4) 0.5315(3) 0.31798(19) 0.0732(11) Uani 1 1 d . . .
C3 C 0.5445(4) 1.1494(3) 0.16291(19) 0.0815(12) Uani 1 1 d . . .
C7 C 0.0855(4) 1.0466(3) 0.16499(18) 0.0715(10) Uani 1 1 d . . .
C11 C 0.0865(4) 0.5470(3) 0.33508(18) 0.0707(10) Uani 1 1 d . . .
C27 C -0.0180(4) 0.8896(3) 0.23954(18) 0.0804(12) Uani 1 1 d . . .
H27A H -0.1004 0.9032 0.2290 0.097 Uiso 1 1 calc R . .
H27B H -0.0310 0.8065 0.2496 0.097 Uiso 1 1 calc R . .
C18 C 0.5441(4) 0.6509(3) 0.33810(19) 0.0827(12) Uani 1 1 d . . .
C2 C 0.3855(4) 1.2724(3) 0.1388(2) 0.0831(12) Uani 1 1 d . . .
H2A H 0.4167 1.2972 0.0979 0.100 Uiso 1 1 calc R . .
H2B H 0.4195 1.3356 0.1677 0.100 Uiso 1 1 calc R . .
C19 C 0.3855(4) 0.7720(3) 0.36095(19) 0.0785(12) Uani 1 1 d . . .
H19A H 0.4198 0.8350 0.3320 0.094 Uiso 1 1 calc R . .
H19B H 0.4171 0.7968 0.4019 0.094 Uiso 1 1 calc R . .
C24 C -0.0180(4) 0.3894(3) 0.26118(18) 0.0792(11) Uani 1 1 d . . .
H24A H -0.0311 0.3061 0.2516 0.095 Uiso 1 1 calc R . .
H24B H -0.1003 0.4034 0.2713 0.095 Uiso 1 1 calc R . .
C1 C 0.2419(4) 1.2389(3) 0.14016(19) 0.0830(12) Uani 1 1 d . . .
H1A H 0.2099 1.2866 0.1699 0.100 Uiso 1 1 calc R . .
H1B H 0.2070 1.2493 0.1000 0.100 Uiso 1 1 calc R . .
C21 C 0.0029(4) 0.3442(4) 0.37345(19) 0.0927(14) Uani 1 1 d . . .
H21A H -0.0817 0.3577 0.3778 0.111 Uiso 1 1 calc R . .
H21B H -0.0073 0.2610 0.3641 0.111 Uiso 1 1 calc R . .
C42 C 0.6449(4) 1.0511(4) 0.2420(2) 0.0920(13) Uani 1 1 d . . .
H42A H 0.6602 0.9757 0.2540 0.110 Uiso 1 1 calc R . .
H42B H 0.7268 1.1045 0.2332 0.110 Uiso 1 1 calc R . .
C20 C 0.2410(4) 0.7390(3) 0.35939(19) 0.0832(12) Uani 1 1 d . . .
H20A H 0.2062 0.7501 0.3994 0.100 Uiso 1 1 calc R . .
H20B H 0.2090 0.7860 0.3293 0.100 Uiso 1 1 calc R . .
C38 C 0.6459(4) 0.5501(4) 0.2590(2) 0.0902(13) Uani 1 1 d . . .
H38A H 0.7278 0.6033 0.2683 0.108 Uiso 1 1 calc R . .
H38B H 0.6613 0.4749 0.2466 0.108 Uiso 1 1 calc R . .
C28 C 0.0311(4) 0.9603(4) 0.29496(19) 0.0907(13) Uani 1 1 d . . .
H28A H 0.0338 1.0428 0.2872 0.109 Uiso 1 1 calc R . .
H28B H 0.1174 0.9542 0.3033 0.109 Uiso 1 1 calc R . .
C30 C 0.0038(4) 0.8452(4) 0.1259(2) 0.0943(14) Uani 1 1 d . . .
H30A H -0.0054 0.7619 0.1345 0.113 Uiso 1 1 calc R . .
H30B H -0.0812 0.8580 0.1224 0.113 Uiso 1 1 calc R . .
C39 C 0.6417(4) 0.9868(4) 0.1312(2) 0.1024(15) Uani 1 1 d . . .
H39A H 0.7253 1.0411 0.1288 0.123 Uiso 1 1 calc R . .
H39B H 0.6541 0.9110 0.1445 0.123 Uiso 1 1 calc R . .
C25 C 0.0321(4) 0.4598(3) 0.20497(19) 0.0884(13) Uani 1 1 d . . .
H25A H 0.1187 0.4540 0.1972 0.106 Uiso 1 1 calc R . .
H25B H 0.0342 0.5424 0.2121 0.106 Uiso 1 1 calc R . .
C33 C 0.6436(4) 0.4884(5) 0.3665(2) 0.1052(15) Uani 1 1 d . . .
H33A H 0.6591 0.4141 0.3525 0.126 Uiso 1 1 calc R . .
H33B H 0.7256 0.5450 0.3692 0.126 Uiso 1 1 calc R . .
C36 C 0.5860(5) 0.6001(4) 0.2060(2) 0.1145(17) Uani 1 1 d . . .
H36A H 0.5756 0.6778 0.2170 0.137 Uiso 1 1 calc R . .
H36B H 0.5022 0.5496 0.1976 0.137 Uiso 1 1 calc R . .
C43 C 0.5842(5) 1.0996(4) 0.2945(2) 0.1018(15) Uani 1 1 d . . .
H43A H 0.5009 1.0478 0.3023 0.122 Uiso 1 1 calc R . .
H43B H 0.5719 1.1765 0.2830 0.122 Uiso 1 1 calc R . .
C23 C 0.0008(7) 0.2894(6) 0.4856(3) 0.155(2) Uani 1 1 d . . .
H23A H -0.0713 0.3173 0.4989 0.232 Uiso 1 1 calc R . .
H23B H 0.0575 0.2900 0.5197 0.232 Uiso 1 1 calc R . .
H23C H -0.0278 0.2103 0.4701 0.232 Uiso 1 1 calc R . .
C31 C 0.0699(5) 0.8731(4) 0.0642(2) 0.1129(17) Uani 1 1 d . . .
H31A H 0.1566 0.8644 0.0677 0.135 Uiso 1 1 calc R . .
H31B H 0.0740 0.9547 0.0536 0.135 Uiso 1 1 calc R . .
C40 C 0.5877(6) 0.9725(5) 0.0698(2) 0.1197(17) Uani 1 1 d . . .
H40A H 0.5849 1.0492 0.0534 0.144 Uiso 1 1 calc R . .
H40B H 0.5011 0.9241 0.0716 0.144 Uiso 1 1 calc R . .
C35 C 0.6691(7) 0.4091(6) 0.4723(3) 0.161(3) Uani 1 1 d . . .
H35A H 0.6630 0.3297 0.4586 0.242 Uiso 1 1 calc R . .
H35B H 0.6360 0.4077 0.5133 0.242 Uiso 1 1 calc R . .
H35C H 0.7568 0.4526 0.4720 0.242 Uiso 1 1 calc R . .
C22 C 0.0716(5) 0.3706(4) 0.4343(2) 0.1104(16) Uani 1 1 d . . .
H22A H 0.0782 0.4525 0.4454 0.133 Uiso 1 1 calc R . .
H22B H 0.1573 0.3597 0.4303 0.133 Uiso 1 1 calc R . .
C44 C 0.6640(7) 1.1122(6) 0.3536(3) 0.160(3) Uani 1 1 d . . .
H44A H 0.7089 1.0506 0.3552 0.240 Uiso 1 1 calc R . .
H44B H 0.6090 1.1060 0.3887 0.240 Uiso 1 1 calc R . .
H44C H 0.7243 1.1878 0.3539 0.240 Uiso 1 1 calc R . .
C26 C -0.0511(6) 0.4156(5) 0.1482(2) 0.1302(19) Uani 1 1 d . . .
H26A H -0.0533 0.3339 0.1410 0.195 Uiso 1 1 calc R . .
H26B H -0.0159 0.4614 0.1129 0.195 Uiso 1 1 calc R . .
H26C H -0.1361 0.4238 0.1552 0.195 Uiso 1 1 calc R . .
C29 C -0.0533(5) 0.9176(5) 0.3519(2) 0.132(2) Uani 1 1 d . . .
H29A H -0.1379 0.9266 0.3443 0.199 Uiso 1 1 calc R . .
H29B H -0.0179 0.9639 0.3871 0.199 Uiso 1 1 calc R . .
H29C H -0.0565 0.8359 0.3595 0.199 Uiso 1 1 calc R . .
C41 C 0.6688(6) 0.9127(6) 0.0260(2) 0.151(2) Uani 1 1 d . . .
H41A H 0.7520 0.9644 0.0209 0.226 Uiso 1 1 calc R . .
H41B H 0.6273 0.8977 -0.0133 0.226 Uiso 1 1 calc R . .
H41C H 0.6768 0.8394 0.0438 0.226 Uiso 1 1 calc R . .
O12 O 0.3085(8) 0.0052(6) 0.4191(4) 0.232(3) Uani 1 1 d . . .
C32 C 0.0022(7) 0.7934(5) 0.0129(3) 0.150(2) Uani 1 1 d . . .
H32A H -0.0230 0.7134 0.0274 0.225 Uiso 1 1 calc R . .
H32B H 0.0588 0.7976 -0.0215 0.225 Uiso 1 1 calc R . .
H32C H -0.0719 0.8189 0.0002 0.225 Uiso 1 1 calc R . .
C34 C 0.5892(6) 0.4708(5) 0.4277(3) 0.1256(19) Uani 1 1 d . . .
H34A H 0.5026 0.4224 0.4250 0.151 Uiso 1 1 calc R . .
H34B H 0.5857 0.5468 0.4449 0.151 Uiso 1 1 calc R . .
C37 C 0.6705(7) 0.6097(6) 0.1470(3) 0.168(3) Uani 1 1 d . . .
H37A H 0.7556 0.6537 0.1564 0.252 Uiso 1 1 calc R . .
H37B H 0.6355 0.6495 0.1152 0.252 Uiso 1 1 calc R . .
H37C H 0.6722 0.5319 0.1333 0.252 Uiso 1 1 calc R . .
C46 C 0.3064(14) 0.1154(11) 0.4058(5) 0.270(7) Uani 1 1 d . . .
H46A H 0.2208 0.1197 0.3945 0.324 Uiso 1 1 calc R . .
H46B H 0.3631 0.1445 0.3717 0.324 Uiso 1 1 calc R . .
C58 C 0.3068(8) 0.5074(7) 0.0801(4) 0.160(3) Uani 1 1 d . . .
H58A H 0.3888 0.4940 0.0917 0.192 Uiso 1 1 calc R . .
H58B H 0.2411 0.4556 0.1043 0.192 Uiso 1 1 calc R . .
C49 C 0.2859(12) 0.4867(8) 0.0223(7) 0.241(5) Uani 1 1 d . . .
H49A H 0.2002 0.4382 0.0161 0.289 Uiso 1 1 calc R . .
H49B H 0.3457 0.4442 0.0062 0.289 Uiso 1 1 calc R . .
C48 C 0.3056(11) 0.6236(10) 0.0902(5) 0.248(5) Uani 1 1 d . . .
H48A H 0.3642 0.6570 0.1231 0.298 Uiso 1 1 calc R . .
H48B H 0.2208 0.6299 0.1014 0.298 Uiso 1 1 calc R . .
C52 C 0.3442(16) 0.6835(10) 0.0339(8) 0.314(9) Uani 1 1 d . . .
H52A H 0.3044 0.7488 0.0279 0.377 Uiso 1 1 calc R . .
H52B H 0.4361 0.7127 0.0319 0.377 Uiso 1 1 calc R . .
O13 O 0.3005(15) 0.5943(13) -0.0087(5) 0.369(7) Uani 1 1 d . . .
C53 C 0.3446(15) 0.1795(8) 0.4561(10) 0.311(8) Uani 1 1 d . . .
H53A H 0.3054 0.2458 0.4585 0.373 Uiso 1 1 calc R . .
H53B H 0.4365 0.2092 0.4564 0.373 Uiso 1 1 calc R . .
C55 C 0.3023(15) 0.0962(14) 0.5079(5) 0.284(7) Uani 1 1 d . . .
H55A H 0.3660 0.1075 0.5403 0.341 Uiso 1 1 calc R . .
H55B H 0.2221 0.1045 0.5249 0.341 Uiso 1 1 calc R . .
C54 C 0.2892(12) -0.0086(9) 0.4800(6) 0.245(6) Uani 1 1 d . . .
H54A H 0.3500 -0.0487 0.4972 0.294 Uiso 1 1 calc R . .
H54B H 0.2042 -0.0573 0.4874 0.294 Uiso 1 1 calc R . .

loop_
_atom_site_aniso_label
_atom_site_aniso_U_11
_atom_site_aniso_U_22
_atom_site_aniso_U_33
_atom_site_aniso_U_23
_atom_site_aniso_U_13
_atom_site_aniso_U_12
N3 0.069(2) 0.0445(15) 0.077(2) 0.0072(14) 0.0049(15) -0.0056(14)
N1 0.065(2) 0.0460(15) 0.0693(19) -0.0059(13) 0.0066(15) 0.0088(14)
N2 0.066(2) 0.0481(16) 0.077(2) -0.0076(14) 0.0083(15) -0.0026(14)
N4 0.065(2) 0.0465(15) 0.075(2) 0.0072(13) 0.0046(15) 0.0101(14)
O7 0.0752(19) 0.0517(14) 0.129(2) -0.0243(15) -0.0029(16) 0.0025(13)
O5 0.0756(19) 0.0512(15) 0.138(2) 0.0224(15) 0.0203(16) 0.0035(13)
C6 0.060(2) 0.0472(19) 0.057(2) -0.0043(15) 0.0104(16) -0.0006(16)
C10 0.060(2) 0.0426(17) 0.060(2) 0.0042(15) 0.0064(16) 0.0062(15)
C14 0.059(2) 0.0496(18) 0.058(2) -0.0037(15) 0.0111(16) 0.0026(15)
C15 0.058(2) 0.0448(18) 0.057(2) 0.0008(15) 0.0076(16) -0.0013(16)
O8 0.075(2) 0.0729(17) 0.147(3) -0.0227(17) 0.0150(17) 0.0203(14)
C9 0.056(2) 0.047(2) 0.083(3) 0.0026(17) 0.0102(18) 0.0039(16)
O6 0.073(2) 0.0742(18) 0.148(3) 0.0214(17) -0.0023(17) 0.0137(15)
C12 0.055(2) 0.061(2) 0.081(3) -0.0044(18) 0.0044(19) -0.0003(17)
O1 0.076(2) 0.095(2) 0.141(3) -0.0224(19) 0.0149(18) 0.0294(17)
C13 0.066(2) 0.056(2) 0.071(2) -0.0044(18) 0.0041(18) -0.0034(18)
C8 0.058(2) 0.057(2) 0.088(3) 0.0026(19) 0.0135(19) -0.0019(17)
O4 0.074(2) 0.093(2) 0.148(3) 0.0231(18) 0.0026(19) 0.0303(17)
O3 0.075(2) 0.094(2) 0.185(3) 0.036(2) 0.009(2) -0.0219(18)
C5 0.062(2) 0.054(2) 0.079(3) 0.0057(18) 0.0065(18) 0.0073(17)
C16 0.059(2) 0.057(2) 0.077(2) -0.0061(18) 0.0063(18) 0.0123(17)
O2 0.072(2) 0.101(2) 0.187(3) -0.050(2) 0.002(2) -0.0222(18)
C4 0.061(2) 0.065(2) 0.089(3) 0.010(2) 0.002(2) 0.0025(18)
C17 0.060(2) 0.069(2) 0.087(3) -0.006(2) 0.008(2) 0.0075(18)
C3 0.057(3) 0.074(3) 0.099(3) 0.010(2) 0.006(2) -0.012(2)
C7 0.066(3) 0.065(2) 0.084(3) 0.0063(19) 0.007(2) 0.016(2)
C11 0.069(3) 0.066(2) 0.080(3) -0.0040(19) 0.013(2) 0.021(2)
C27 0.059(2) 0.080(3) 0.094(3) 0.008(2) 0.018(2) 0.0002(19)
C18 0.065(3) 0.076(3) 0.091(3) -0.016(2) 0.010(2) -0.015(2)
C2 0.093(3) 0.050(2) 0.100(3) 0.0126(19) 0.000(2) 0.005(2)
C19 0.091(3) 0.0433(19) 0.094(3) -0.0087(18) 0.011(2) 0.0030(19)
C24 0.056(2) 0.071(2) 0.104(3) -0.002(2) -0.001(2) 0.0036(18)
C1 0.101(4) 0.054(2) 0.093(3) 0.007(2) 0.009(2) 0.016(2)
C21 0.078(3) 0.087(3) 0.099(3) 0.003(2) 0.027(2) -0.006(2)
C42 0.068(3) 0.089(3) 0.111(4) 0.002(3) -0.006(3) 0.005(2)
C20 0.104(4) 0.061(2) 0.082(3) -0.013(2) 0.005(2) 0.017(2)
C38 0.063(3) 0.086(3) 0.117(4) 0.005(3) 0.016(2) 0.007(2)
C28 0.085(3) 0.089(3) 0.094(3) -0.001(2) 0.025(2) 0.013(2)
C30 0.080(3) 0.085(3) 0.104(3) -0.012(2) -0.002(3) -0.005(2)
C39 0.065(3) 0.118(4) 0.115(4) 0.015(3) 0.017(3) 0.007(3)
C25 0.082(3) 0.075(2) 0.107(3) 0.000(2) -0.001(3) 0.016(2)
C33 0.072(3) 0.136(4) 0.102(4) -0.023(3) 0.006(3) 0.013(3)
C36 0.119(4) 0.090(3) 0.127(4) 0.006(3) 0.043(3) 0.013(3)
C43 0.112(4) 0.077(3) 0.114(4) -0.013(3) -0.016(3) 0.019(3)
C23 0.164(6) 0.171(5) 0.122(4) 0.047(4) 0.056(4) 0.024(5)
C31 0.117(4) 0.119(4) 0.094(4) -0.017(3) 0.003(3) 0.011(3)
C40 0.116(4) 0.145(4) 0.100(4) 0.010(3) 0.005(3) 0.034(3)
C35 0.171(7) 0.218(7) 0.108(4) -0.001(4) -0.045(4) 0.074(6)
C22 0.118(4) 0.120(4) 0.085(3) 0.020(3) 0.019(3) 0.011(3)
C44 0.178(7) 0.167(5) 0.122(5) -0.017(4) -0.059(5) 0.016(5)
C26 0.119(5) 0.158(5) 0.107(4) -0.012(3) -0.040(3) 0.020(4)
C29 0.119(5) 0.163(5) 0.105(4) 0.005(3) 0.051(3) 0.014(4)
C41 0.152(6) 0.212(6) 0.102(4) 0.001(4) 0.045(4) 0.070(5)
O12 0.383(11) 0.155(6) 0.175(6) -0.024(5) 0.001(5) 0.101(6)
C32 0.172(7) 0.168(5) 0.108(4) -0.041(4) -0.046(4) 0.038(5)
C34 0.106(4) 0.152(5) 0.122(4) -0.019(4) -0.004(4) 0.039(4)
C37 0.183(7) 0.169(6) 0.138(5) 0.030(4) 0.085(5) 0.013(5)
C46 0.45(2) 0.130(7) 0.197(10) 0.038(7) -0.093(10) 0.004(10)
C58 0.264(10) 0.126(6) 0.104(5) 0.040(4) 0.020(5) 0.076(6)
C49 0.359(16) 0.113(6) 0.237(13) 0.000(8) 0.035(11) 0.032(8)
C48 0.307(14) 0.175(9) 0.246(12) -0.086(9) 0.088(10) 0.029(9)
C52 0.40(2) 0.179(10) 0.279(16) 0.070(11) -0.041(14) -0.081(11)
O13 0.54(2) 0.300(12) 0.245(10) -0.003(9) -0.055(10) 0.068(13)
C53 0.356(19) 0.117(7) 0.41(2) 0.008(12) -0.019(16) -0.044(9)
C55 0.44(2) 0.227(12) 0.175(10) -0.058(11) 0.033(10) 0.054(13)
C54 0.409(18) 0.148(8) 0.163(9) 0.019(8) 0.006(9) 0.039(9)

_geom_special_details            
; 
 All esds (except the esd in the dihedral angle between two l.s. planes) 
 are estimated using the full covariance matrix.  The cell esds are taken 
 into account individually in the estimation of esds in distances, angles 
 and torsion angles; correlations between esds in cell parameters are only 
 used when they are defined by crystal symmetry.  An approximate (isotropic) 
 treatment of cell esds is used for estimating esds involving l.s. planes. 
;

loop_
_geom_bond_atom_site_label_1
_geom_bond_atom_site_label_2
_geom_bond_distance
_geom_bond_site_symmetry_2
_geom_bond_publ_flag
N3 C6 1.363(4) . ?
N3 C3 1.400(5) . ?
N3 C2 1.467(5) . ?
N1 C15 1.360(4) . ?
N1 C11 1.374(5) . ?
N1 C20 1.456(4) . ?
N2 C15 1.351(4) . ?
N2 C18 1.404(5) . ?
N2 C19 1.454(5) . ?
N4 C6 1.366(5) . ?
N4 C7 1.384(5) . ?
N4 C1 1.454(4) . ?
O7 C13 1.226(4) . ?
O5 C9 1.221(4) . ?
C6 C10 1.384(5) . ?
C10 C5 1.444(5) . ?
C10 C9 1.451(5) . ?
C14 C15 1.377(4) . ?
C14 C16 1.457(5) . ?
C14 C13 1.457(5) . ?
O8 C16 1.208(4) . ?
C9 C8 1.551(5) . ?
O6 C5 1.233(4) . ?
C12 C11 1.518(5) . ?
C12 C24 1.543(5) . ?
C12 C21 1.547(5) . ?
C12 C13 1.572(5) . ?
O1 C11 1.200(4) . ?
C8 C7 1.522(5) . ?
C8 C30 1.547(5) . ?
C8 C27 1.570(5) . ?
O4 C7 1.192(5) . ?
O3 C3 1.213(4) . ?
C5 C4 1.533(5) . ?
C16 C17 1.543(5) . ?
O2 C18 1.207(4) . ?
C4 C3 1.472(6) . ?
C4 C42 1.559(6) . ?
C4 C39 1.581(6) . ?
C17 C33 1.520(6) . ?
C17 C18 1.525(6) . ?
C17 C38 1.544(6) . ?
C27 C28 1.482(5) . ?
C2 C1 1.506(6) . ?
C19 C20 1.516(6) . ?
C24 C25 1.499(5) . ?
C21 C22 1.510(6) . ?
C42 C43 1.496(6) . ?
C38 C36 1.505(6) . ?
C28 C29 1.547(6) . ?
C30 C31 1.518(6) . ?
C39 C40 1.447(6) . ?
C25 C26 1.539(5) . ?
C33 C34 1.451(7) . ?
C36 C37 1.564(7) . ?
C43 C44 1.533(6) . ?
C23 C22 1.541(6) . ?
C31 C32 1.519(6) . ?
C40 C41 1.569(7) . ?
C35 C34 1.581(7) . ?
O12 C46 1.323(10) . ?
O12 C54 1.343(10) . ?
C46 C53 1.330(14) . ?
C58 C49 1.288(11) . ?
C58 C48 1.376(10) . ?
C49 O13 1.399(11) . ?
C48 C52 1.421(13) . ?
C52 O13 1.385(13) . ?
C53 C55 1.484(15) . ?
C55 C54 1.340(11) . ?

loop_
_geom_angle_atom_site_label_1
_geom_angle_atom_site_label_2
_geom_angle_atom_site_label_3
_geom_angle
_geom_angle_site_symmetry_1
_geom_angle_site_symmetry_3
_geom_angle_publ_flag
C6 N3 C3 123.0(3) . . ?
C6 N3 C2 111.7(3) . . ?
C3 N3 C2 125.3(3) . . ?
C15 N1 C11 123.9(3) . . ?
C15 N1 C20 111.8(3) . . ?
C11 N1 C20 124.3(3) . . ?
C15 N2 C18 123.4(3) . . ?
C15 N2 C19 112.6(3) . . ?
C18 N2 C19 124.0(3) . . ?
C6 N4 C7 123.5(3) . . ?
C6 N4 C1 111.4(3) . . ?
C7 N4 C1 125.0(3) . . ?
N3 C6 N4 108.7(3) . . ?
N3 C6 C10 124.6(4) . . ?
N4 C6 C10 126.7(3) . . ?
C6 C10 C5 117.6(3) . . ?
C6 C10 C9 116.2(3) . . ?
C5 C10 C9 126.2(3) . . ?
C15 C14 C16 118.5(3) . . ?
C15 C14 C13 116.9(3) . . ?
C16 C14 C13 124.6(3) . . ?
N2 C15 N1 108.5(3) . . ?
N2 C15 C14 125.1(3) . . ?
N1 C15 C14 126.4(3) . . ?
O5 C9 C10 123.4(3) . . ?
O5 C9 C8 116.7(3) . . ?
C10 C9 C8 119.8(3) . . ?
C11 C12 C24 109.0(3) . . ?
C11 C12 C21 107.0(3) . . ?
C24 C12 C21 109.1(3) . . ?
C11 C12 C13 115.9(3) . . ?
C24 C12 C13 108.7(3) . . ?
C21 C12 C13 107.1(3) . . ?
O7 C13 C14 123.5(4) . . ?
O7 C13 C12 117.4(3) . . ?
C14 C13 C12 119.1(3) . . ?
C7 C8 C30 105.9(3) . . ?
C7 C8 C9 116.5(3) . . ?
C30 C8 C9 108.6(3) . . ?
C7 C8 C27 107.8(3) . . ?
C30 C8 C27 109.5(3) . . ?
C9 C8 C27 108.3(3) . . ?
O6 C5 C10 122.3(3) . . ?
O6 C5 C4 118.1(4) . . ?
C10 C5 C4 119.6(3) . . ?
O8 C16 C14 123.1(3) . . ?
O8 C16 C17 117.4(3) . . ?
C14 C16 C17 119.4(3) . . ?
C3 C4 C5 116.9(4) . . ?
C3 C4 C42 108.4(3) . . ?
C5 C4 C42 107.1(3) . . ?
C3 C4 C39 108.7(3) . . ?
C5 C4 C39 108.6(3) . . ?
C42 C4 C39 106.7(4) . . ?
C33 C17 C18 108.7(3) . . ?
C33 C17 C38 105.7(4) . . ?
C18 C17 C38 108.3(3) . . ?
C33 C17 C16 109.9(3) . . ?
C18 C17 C16 115.5(3) . . ?
C38 C17 C16 108.4(3) . . ?
O3 C3 N3 117.3(4) . . ?
O3 C3 C4 124.4(4) . . ?
N3 C3 C4 118.3(3) . . ?
O4 C7 N4 119.4(4) . . ?
O4 C7 C8 123.7(4) . . ?
N4 C7 C8 116.9(4) . . ?
O1 C11 N1 119.6(3) . . ?
O1 C11 C12 122.7(4) . . ?
N1 C11 C12 117.6(3) . . ?
C28 C27 C8 114.8(3) . . ?
O2 C18 N2 118.4(4) . . ?
O2 C18 C17 123.5(4) . . ?
N2 C18 C17 118.1(3) . . ?
N3 C2 C1 103.5(3) . . ?
N2 C19 C20 103.3(3) . . ?
C25 C24 C12 114.6(3) . . ?
N4 C1 C2 104.7(3) . . ?
C22 C21 C12 115.2(3) . . ?
C43 C42 C4 113.2(4) . . ?
N1 C20 C19 103.9(3) . . ?
C36 C38 C17 113.8(4) . . ?
C27 C28 C29 111.6(4) . . ?
C31 C30 C8 116.1(4) . . ?
C40 C39 C4 116.6(4) . . ?
C24 C25 C26 111.4(4) . . ?
C34 C33 C17 116.0(4) . . ?
C38 C36 C37 110.8(5) . . ?
C42 C43 C44 112.7(5) . . ?
C30 C31 C32 112.7(5) . . ?
C39 C40 C41 110.9(5) . . ?
C21 C22 C23 111.2(4) . . ?
C46 O12 C54 106.9(8) . . ?
C33 C34 C35 112.2(5) . . ?
O12 C46 C53 106.9(9) . . ?
C49 C58 C48 107.3(8) . . ?
C58 C49 O13 108.9(8) . . ?
C58 C48 C52 105.9(9) . . ?
O13 C52 C48 101.5(10) . . ?
C52 O13 C49 107.3(10) . . ?
C46 C53 C55 104.5(9) . . ?
C54 C55 C53 101.6(10) . . ?
O12 C54 C55 110.9(10) . . ?

_diffrn_measured_fraction_theta_max 0.979
_diffrn_reflns_theta_full        25.26
_diffrn_measured_fraction_theta_full 0.979
_refine_diff_density_max         0.214
_refine_diff_density_min         -0.279
_refine_diff_density_rms         0.051
